# Supplementary material for: Systemic DPP4 activity is reduced during primary HIV‐1 infection and is associated with intestinal RORC + CD4+ cell levels: a surrogate marker candidate of HIV‐induced intestinal damage
Source: PubMed Central journal article supplement (PMC6038000; doi:10.1002/jia2.25144), 2018-07-10
Supplement: JIA2-21-e25144-s001.pdf [file JIA2-21-e25144-s001.pdf]

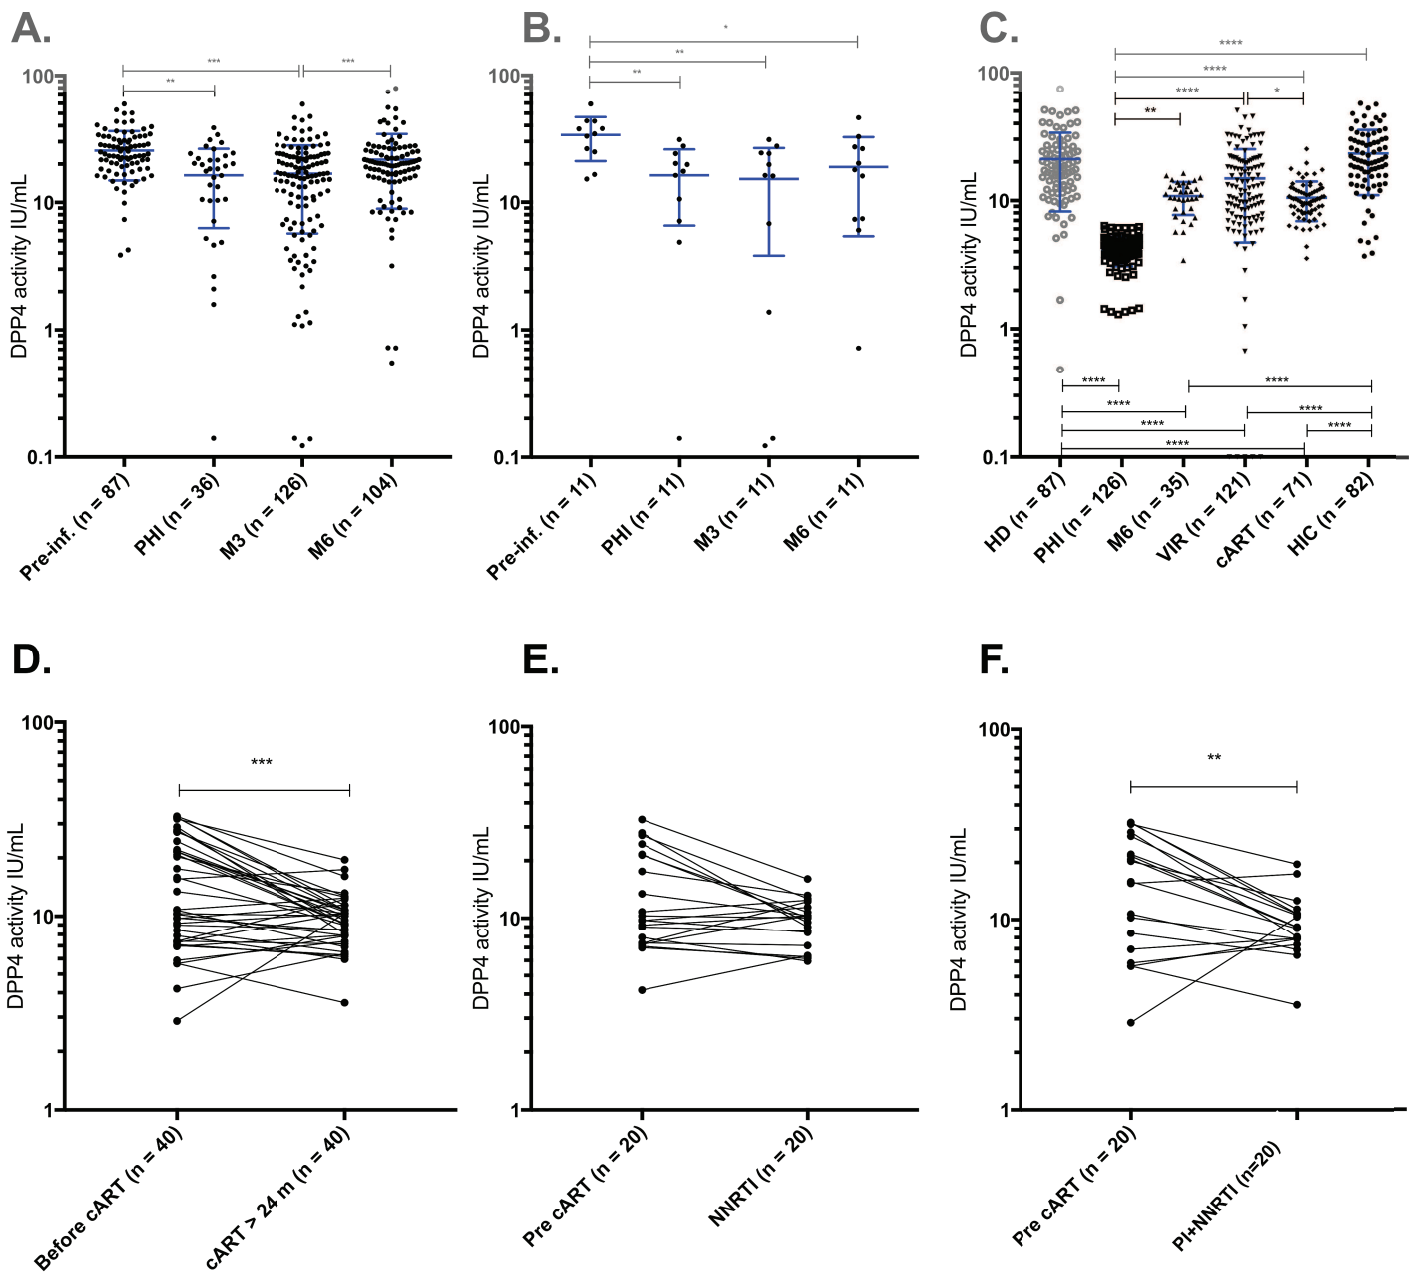

Figure 1

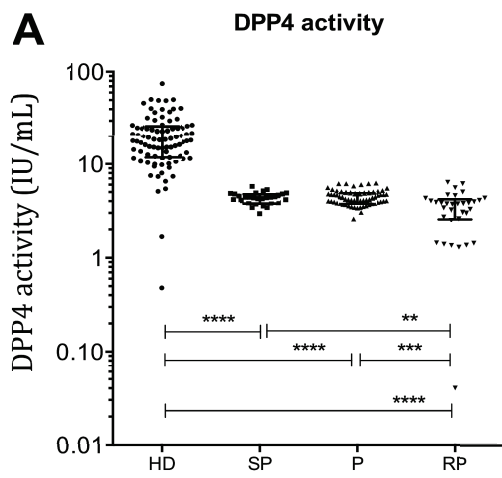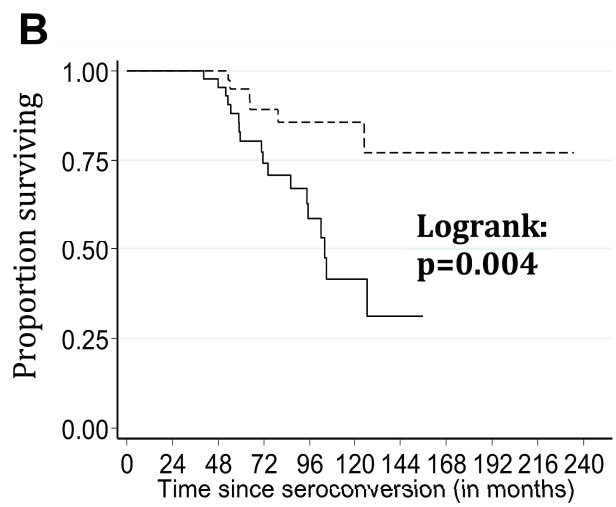

Figure 2

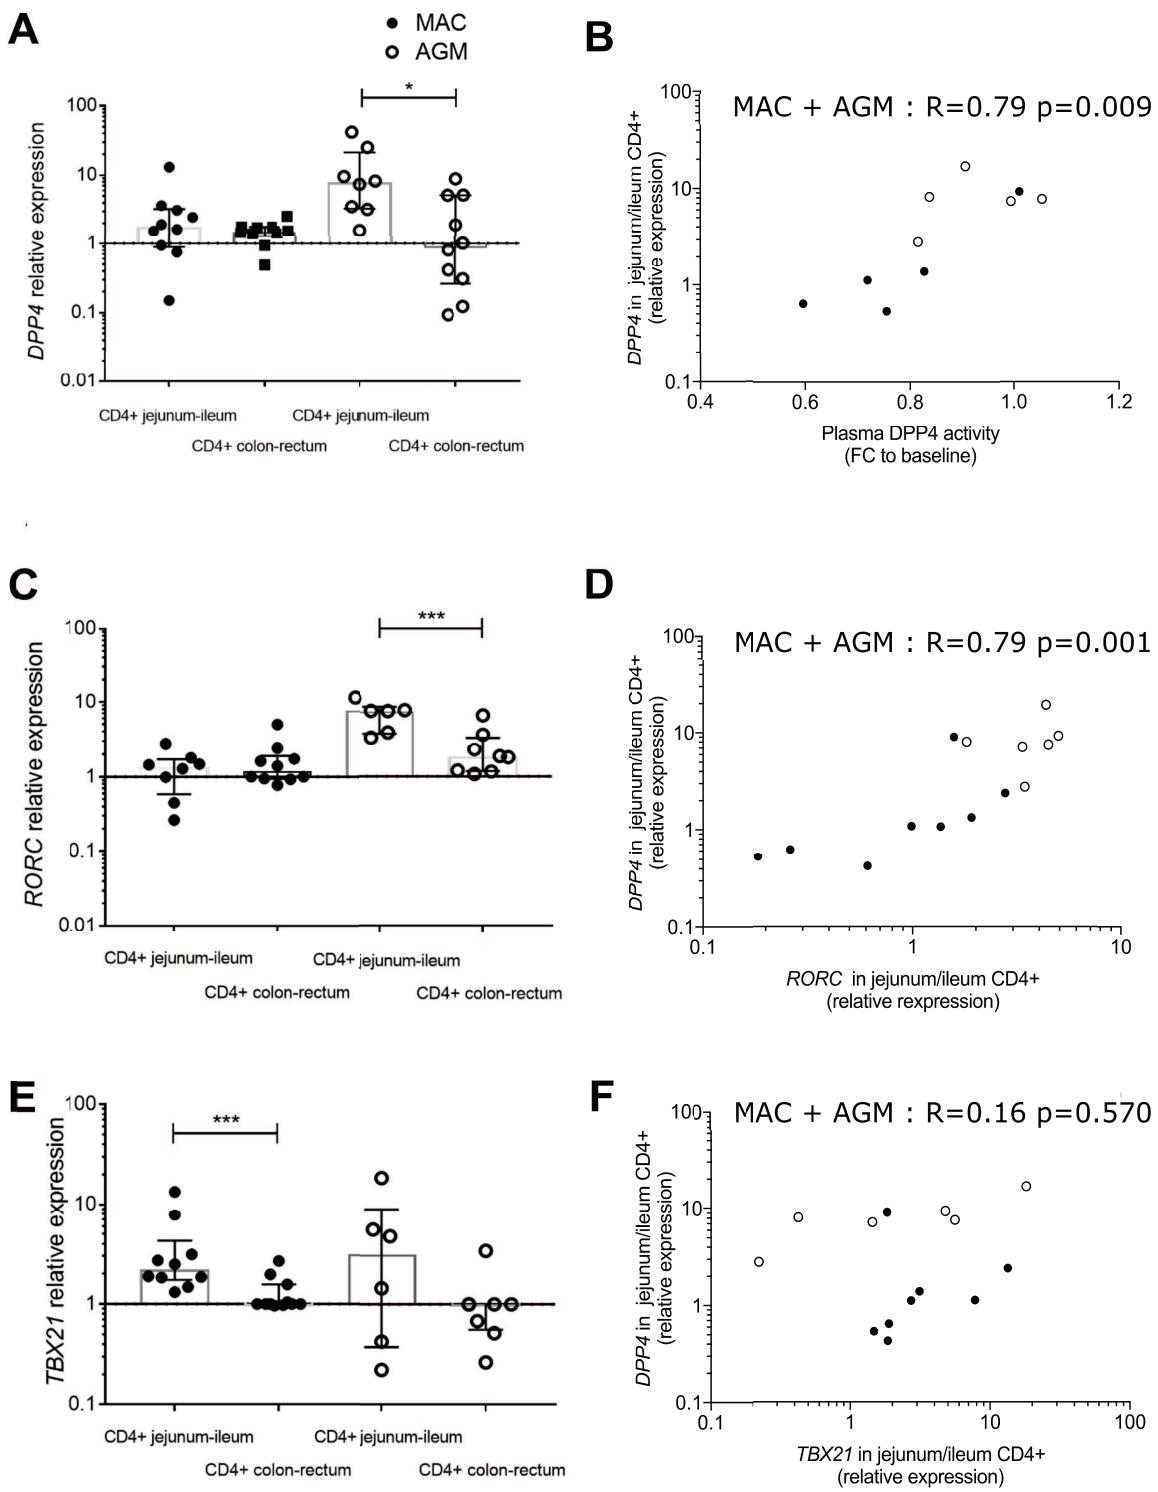

Figure 3

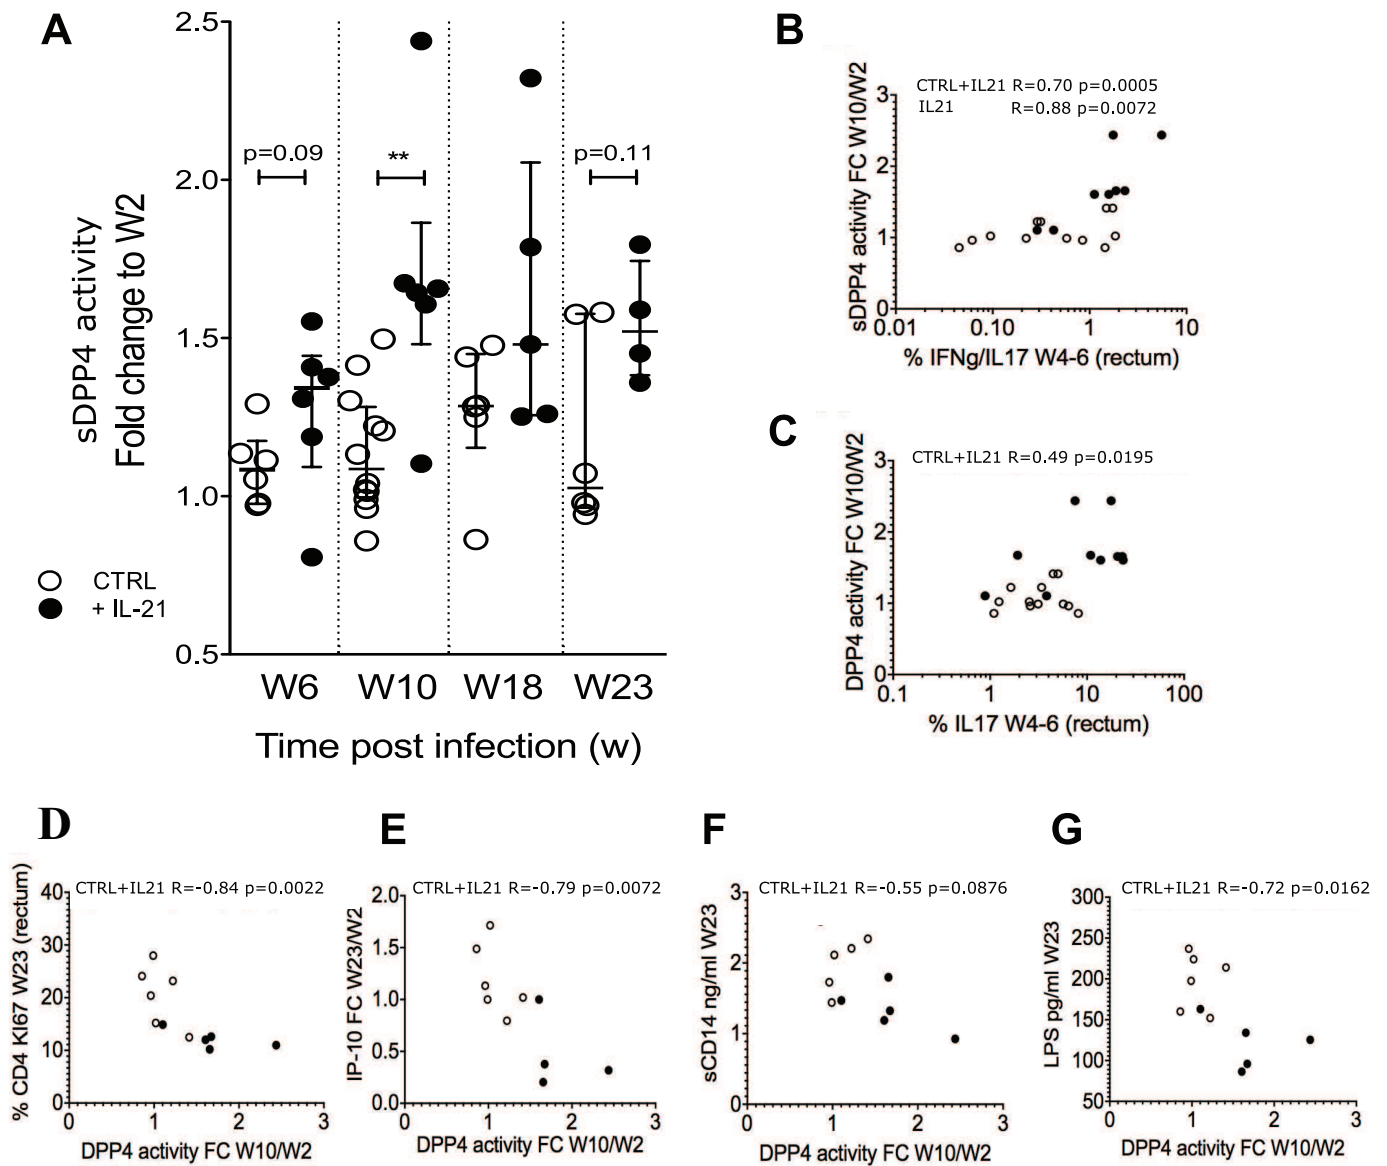

Figure 4

## A) DPP4

>Hum DPP4

GAGGAAGTGGTTACCAAGGAGATAAGATCATGCATGCAATCAACAGAAGACTGGGAACATTTGAAGTTGAAGATC  
AAA**TTGAAGCAGCCA****GACAATTTTCAAA**AATGGGATTTGTGGACAACAAACGAATTGCAATTTGGGGCTGGTCAT  
ATGGAGGGTACGTAACCTCAATGGTCTCTGGG

>AGM DPP4

GAGGAAGTGGTTACCAAGGAGATAAGATCATGCATGCAATCAACAGAAGACTGGGAACATTTGAAGTTGAAGATC  
AAA**TTGAAGCAGCCA****GACAATTTTCAAA**AATGGGATTTGTGGACAACAAACGAATTGCAATTTGGGGCTGGTCAT  
ATGGAGGGTACGTAACCTCAATGGTCTCTGGG

>MAC DPP4

GAGGAAGTGGTTACCAAGGAGATAAGATCATGCATGCAATCAACAGAAGACTGGGAACATTTGAAGTTGAAGATC  
AAA**TTGAAGCAGCCA****GACAATTTTCAAA**AATGGGATTTGTGGACAACAAACGAATTGCAATTTGGGGCTGGTCAT  
ATGGAGGGTACGTAACCTCAATGGTCTCTGGG

## B) TBX21

>Hum TBX21

TGTTGTGGTCCAAGTTTAAATCAGCACCAGACAGAGATGATCATCACCAAG**CAGGGACGGCGG****ATGTTCCCATTC**  
TGTCATTTACTGTGGCCGGGCTGGAGCCCACCAGCCACTACAGGATGTTT

>AGM TBX21

TGTTGTGGTCCAAGTTTAAATCAGCACCAGACAGAGATGATCATCACCAAG**CAGGGACGGCGG****ATGTTCCCATTC**  
TGTCATTTACT**GGTGGCTGGGCTGGAGCCCAC****TAGCCACTACAGGATGTTT**

>MAC TBX21

TGTTGTGGTCCAAGTTTAAATCAGCACCAGACAGAGATGATCATCACCAAG**CAGGGACGGCGG****ATGTTCCCATTC**  
TGTCATTTACT**GGTGGCTGGGCTGGAGCCCAC****TAGCCACTACAGGATGTTT**

## C) RORC

>Hum RORC

AGCTGGCCTTTTCATCATCATCTCTGCAAGACTCATCGCCAAAGCATCCTG**GCAAAGCTGCCA****CCAAGGGGAAGC**  
TTCGGAGCCTGTGTAGCCAGCATGTGGAAAGGCTGCAGATCTTCCAGCAC

>AGM RORC

AGCTGGC**ATTTTCATCATCATCTCTGCAA****AACTCATCGCCAAAGCATCCTG****GCAAAGCTGCCA****CCAAGGGGAAGC**  
TTCGGAGCCTGTGTAGCCAGCA**CATGGAAAGGCTGCAGATCTTCCAGCAC**

>MAC RORC

AGCTGGCCTTTTCATCATCATCTCTGCAA**AACTCATCGCCAAAGCATCCTG****GCAAAGCTGCCA****CCAAGGGGAAGC**  
TTCGGAGCCTGTGTAGCCAGCA**CGTGGAAAGGCTGCAGATCTTCCAGCAC**

## D) 18S

>Hum 18S

CAGGGTTCGATTCCGGAGAGGGAGCCTGAGAAAACGGCTACCACATCCAAGGAAGGCAGCAGGCGCGCAAATTACC  
CACTCCCGACCCGGGGAGGTAGTGACGAAAAATAACAATACAGGACTCTTTCGAGGCCCTGTAATTGGAATGAGT  
CCACTTTAAATCCTTTAACGAGGAT**CCATTGGAGGGCA****AGTCTGGTGCCA**GCAGCCGCGGTAATTCCAGCTCCAA  
TAGCGTATATTAAGTTGCTGCAGTTAAAAAGCTCGTAGTTGGATCTTGGGAGCGGGCGGGCGGTCCGCCGCGAG  
GCGAGCCACCGCCGTC**CCCCGCCCTTGCCCTCTCGGCGCCCCCTCGATGCTCTTAGCTGAGTGTCCCGGGGGCC**

>MAC

CAGGGTTCGATTCCGGAGAGGGAGCCTGAGAAAACGGCTACCACATCCAAGGAAGGCAGCAGGCGCGCAAATTACC  
CACTCCCGACCCGGGGAGGTAGTGACGAAAAATAACAATACAGGACTCTTTCGAGGCCCTGTAATTGGAATGAGT  
CCACTTTAAATCCTTTAACGAGGAT**CCATTGGAGGGCA****AGTCTGGTGCCA**GCAGCCGCGGTAATTCCAGCTCCAA  
TAGCGTATATTAAGTTGCTGCAGTTAAAAAGCTCGTAGTTGGATCTTGGGA**GCGG**GCGGGCGGGCGGTCCGCCG  
CGAGGCGAGCCACCGCCGTC**CCCCGCCCTTGCCCTCTCGGCGCCCCCTCGATGCTCTTAGCTGAGTGTCCCGG**  
GGGCC

Supplementary Figure 1

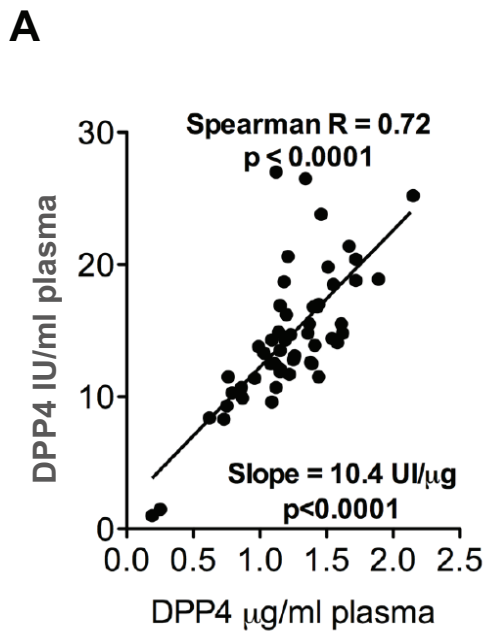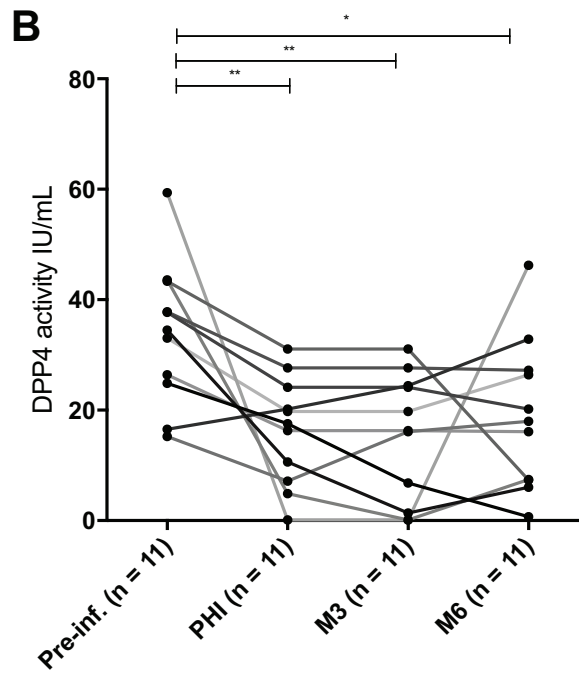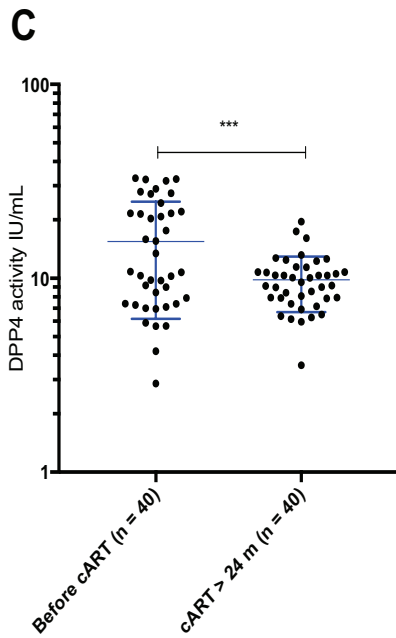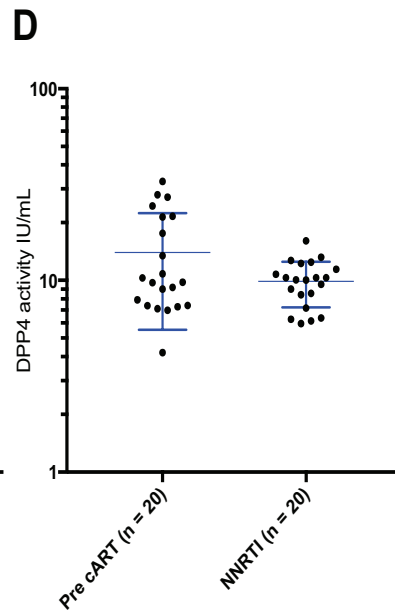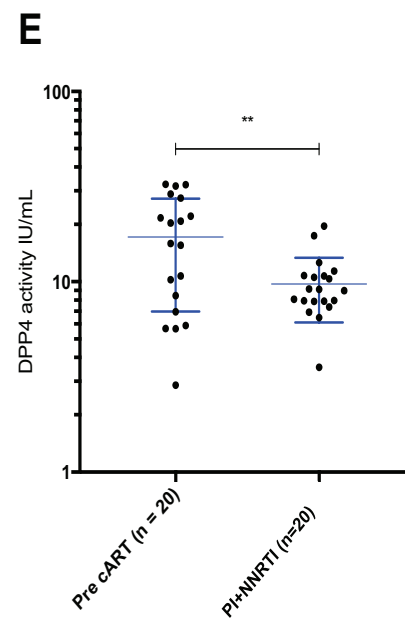

Supplementary Figure 2

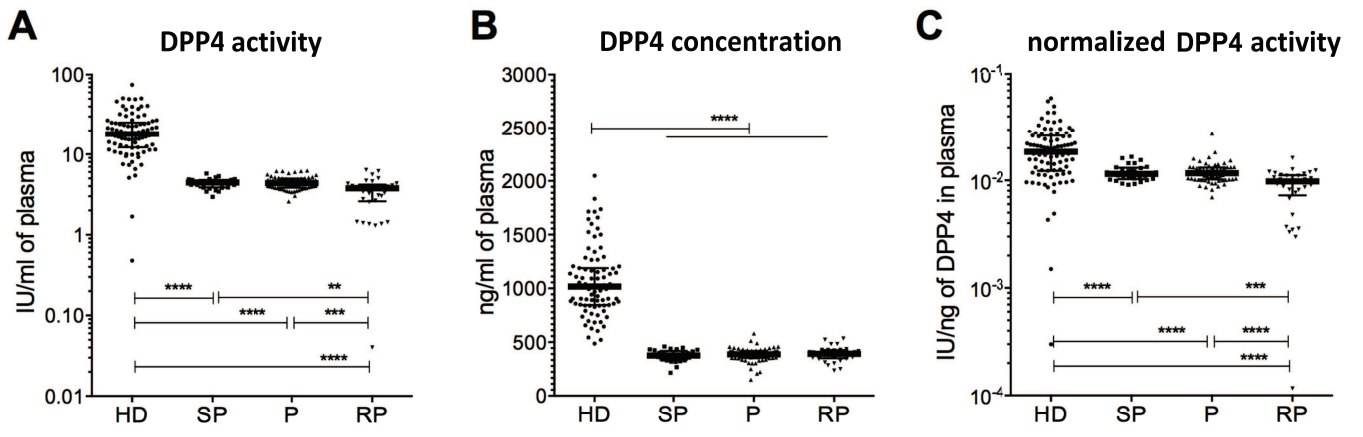

Supplementary Figure 3

**A**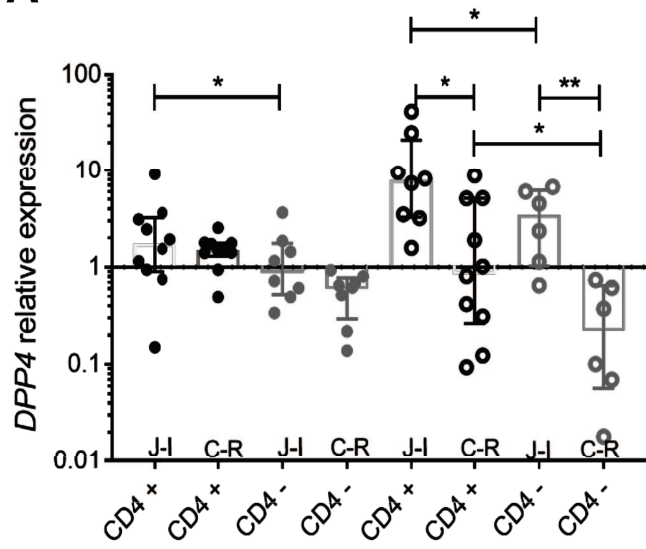**B**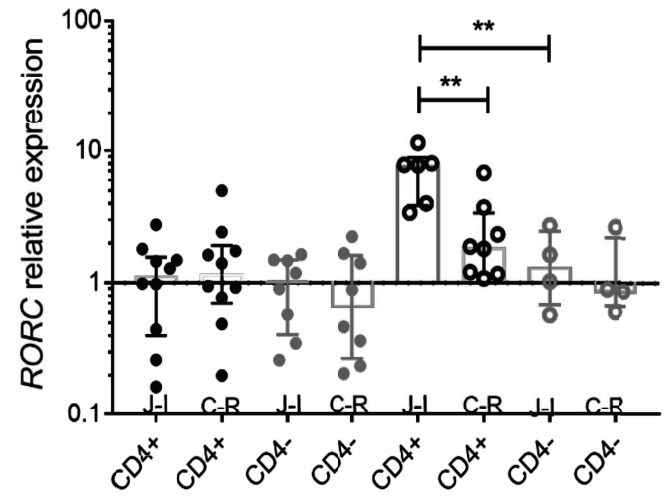

Supplementary Figure 4
